# Supplementary material for: Structural and theoretical study of copper(ii) complex incorporating chalcone and 2,2′-bipyridine mixed ligands: a probable candidate for optical material
Source: Royal Society of Chemistry journal article supplement (doi:10.1039/d2nj02988j), 2022-01-01
Supplement: d2nj02988j1.pdf [file d2nj02988j1.pdf]

## Supplementary Information

### **Structural and theoretical study of copper(II) complex incorporating chalcone and 2,2'-bipyridine mixed ligands : A probable candidate for optical material**

*Ruchi Gaur<sup>a#\*</sup>, Parashuram Kallem<sup>b,c</sup>*

<sup>a</sup>Department of Chemistry, Institute of Science, Banaras Hindu University, Varanasi-221005  
India

<sup>b</sup>Center for Membranes and Advanced Water Technology (CMAT), Khalifa University of  
Science and Technology, P.O. Box 127788, Abu Dhabi, United Arab Emirates

<sup>c</sup>Department of Chemical Engineering, Khalifa University of Science and Technology, PO  
Box 127788, Abu Dhabi, United Arab Emirates

<sup>#</sup>*Current address:* Solid State and Structural Chemistry Unit, Indian Institute of Science,  
Bangalore-560012, India

**SI 1:** Selected bond lengths (Å) and bond angles (°) of **CuM**.

|            |            |                 |           |
|------------|------------|-----------------|-----------|
| Cu(1)-O(1) | 1.880(2)   | O(1)-Cu(1)-O(2) | 92.23(9)  |
| Cu(1)-O(2) | 1.9193(19) | O(1)-Cu(1)-O(3) | 99.95(19) |
| Cu(1)-O(3) | 2.443(8)   | N(1)-Cu(1)-N(2) | 81.02(11) |
| Cu(1)-N(1) | 1.992(3)   | O(2)-Cu(1)-N(1) | 92.55(10) |
| Cu(1)-N(2) | 2.002(3)   | O(3)-Cu(1)-N(1) | 81.4(2)   |
| S(1)-C(24) | 1.703(5)   | C(20)-S(1)-(24) | 90.8(2)   |

**SI 2:** Geometric features of  $\pi$ - $\pi$  interactions obtained from **CuM**.

| Cg(I)··· Cg(ring J)      | Cg···Cg (Å) | $\alpha$ (°) | $\beta$ (°) | $\gamma$ (°) | Cg(I)···Prep (Å) | Cg(J)···Prep(Å) |
|--------------------------|-------------|--------------|-------------|--------------|------------------|-----------------|
| Cg(4)-Cg(6) <sup>a</sup> | 3.6783(19)  | 4.88         | 26.30       | 21.4         | -3.4239(14)      | -3.2975(11)     |

Symmetry transformation<sup>a</sup> = -X,-Y,1-Z; Cg(4) = center of gravity of the ring N(1)-C(1)-C(2)-C(3)-C(4)-C(5); Cg(6) = center of gravity of the ring C(11)-C(12)-C(13)-C(14)- C(15)-C(16).
